# Supplementary material for: Protein gradients on the nucleoid position the carbon-fixing organelles of cyanobacteria
Source: eLife journal article supplement (doi:10.7554/elife.39723), 2018-12-06
Supplement: supp [file elife-39723-supp-v1.zip]

Archive with 16 entries (16 files):
- elife_poa_e39723_Figure_2_figure_supplement_1.tif
- elife_poa_e39723_Video_5.mp4
- elife_poa_e39723_Figure_1_figure_supplement_1_source_data_1.xlsx
- elife_poa_e39723_Transparent_Reporting_File.pdf
- elife_poa_e39723_Figure_7_figure_supplement_1.tif
- elife_poa_e39723_Video_1.mp4
- elife_poa_e39723_Video_2.mp4
- elife_poa_e39723_Figure_3_figure_supplement_1.tif
- elife_poa_e39723_Figure_2_figure_supplement_1_source_data_3.xlsx
- elife_poa_e39723_Figure_2_figure_supplement_1_source_data_2.xlsx
- elife_poa_e39723_Figure_2_figure_supplement_1_source_data_4.xlsx
- elife_poa_e39723_Figure_1_figure_supplement_1.tif
- elife_poa_e39723_Figure_2_figure_supplement_1_source_data_1.xlsx
- elife_poa_e39723_Video_3.mp4
- elife_poa_e39723_Figure_5_figure_supplement_1.tif
- elife_poa_e39723_Video_4.mp4
