# Supplementary material for: Protein gradients on the nucleoid position the carbon-fixing organelles of cyanobacteria
Source: eLife journal article supplement (doi:10.7554/elife.39723), 2018-12-06
Supplement: supp [file elife-39723-supp-v1.zip › elife_poa_e39723_Figure_1_figure_supplement_1_source_data_1.xlsx]

## Sheet: Sheet1
Cell Length	Carboxysomes
3.7	5
2.5	5
3	8
3.4	8
4.2	8
4.8	11
3.1	6
2.4	5
3.5	7
3.5	10
2.3	6
2	4
2.3	5
4	7
3.1	5
6.4	12
3.4	9
2.4	4
2.8	6
3.2	7
2.8	6
3.7	8
3	9
3.9	8
3.1	6
4.2	8
3.2	7
2.4	5
4.6	10
3.1	7
3.4	6
4.5	10
3.5	5
5.2	11
2.4	5
5	11
5.2	11
2.6	5
4.2	8
4.7	9
6	13
5.4	11
4.2	9
4	9
3.9	8
2.6	6
3.6	8
3.3	8
4.5	9
3.9	6
3.6	8
4.2	10
4.1	9
3.1	7
4.2	10
4.8	11
4.9	12
5.6	13
4	8
2.7	6
2.5	4
1.9	6
4.3	10
3	8
2.1	4
2.4	5
5.4	12
4.2	9
6.2	14
3.3	8
2.9	7
3.5	6
3.2	7
4.5	9
7.3	16
5	12
3.7	7
3.8	7
6.9	13
4.5	8
4.8	10
5.7	14
2.7	5
4.8	9
3.3	7
3.2	7
4	7
3.5	9
2.3	4
3.1	6
2.9	7
4.5	10
3.8	7
3.9	8
1.6	3
2.1	5
1.7	4
4.9	9
5.6	11
2.2	4
1.9	4
2.1	5
2.6	6
3.8	10
3	8
4.2	10
4	8
4.2	10
3.1	6
2.6	4
3.7	8
3	7
5.8	12
2.7	5
2	4
2.7	5
2.8	6
2.8	5
3.6	8
2.2	4
2.9	6
2.3	5
2.5	5
2.8	7
4.5	10
5.5	13
3	6
2.5	5
3	6
2.3	5
2.7	6
2.6	5
4.3	10
4.9	11
4.6	10
4	8
5.8	12
5.8	13
3.5	7
2.3	4
4.5	11
3.8	8
3.6	8
5.2	11
5	12
2.3	5
2.1	5
1.9	4
1.7	3
2.5	5
