# Supplementary material for: Protein gradients on the nucleoid position the carbon-fixing organelles of cyanobacteria
Source: eLife journal article supplement (doi:10.7554/elife.39723), 2018-12-06
Supplement: supp [file elife-39723-supp-v1.zip › elife_poa_e39723_Figure_2_figure_supplement_1_source_data_1.xlsx]

## Sheet: His-MBP-McdA Raw Data
Alone							Alone							Alone							AVG	StdDev
[His-MBP-McdA] (uM)	Pi	Pi - Bgnd	ATP	Total ATP	% Hydrolyzed		[His-MBP-McdA] (uM)	Pi	Pi - Bgnd	ATP	Total ATP	% Hydrolyzed		[His-MBP-McdA]	Pi	Pi - Bgnd	ATP	Total ATP	% Hydrolyzed
0	35.452	0	1075.02	1075.02	0		0	68.262	0	950	950	0		0	79.726	0	1814.13	1814.13	0		0	0
0.05	103.73	68.278	1051	1119.28	6.10018		0.05	82.852	14.59	1050	1064.59	1.37048		0.05	162.136	82.41	1494.97	1577.38	5.2245		4.23172	2.38215
0.1	145.318	109.866	1048.59	1158.46	9.48382		0.1	110.9	42.638	998.749	1041.39	4.09435		0.1	184.9	105.174	834.7	939.874	11.1902		8.25613	3.70382
0.25	202.022	166.57	998.269	1164.84	14.2998		0.25	153.988	85.726	845.781	931.507	9.20294		0.25	294.47	214.744	801.5	1245.33	17.244		13.5822	2.75897
0.5	183.034	147.582	986.906	1134.49	13.0087		0.5	185.166	116.904	768.31	885.214	13.2063		0.5	375.334	295.608	809.2	1609.46	18.3669		14.8606	3.03814
1	265.173	229.721	981	1210.72	18.9739		1	241.722	173.46	664.702	838.162	20.6953		1	462.136	382.41	1400	1782.41	21.4547		20.3746	1.27109
2	343.541	308.089	861.213	1169.3	26.3481		2	296.38	228.118	653.027	881.145	25.8888		2	481.29	401.564	1160	1561.56	25.7155		25.9841	0.326902
+DNA							+DNA							+DNA
[His-MBP-McdA]	Pi	Pi - Bgnd	ATP	Total ATP	% Hydrolyzed		[His-MBP-McdA]	Pi	Pi - Bgnd	ATP	Total ATP	% Hydrolyzed		[His-MBP-McdA]	Pi	Pi - Bgnd	ATP	Total ATP	% Hydrolyzed
0	30.834	0	1021.07	1021.07	0		0	35	0	1202.16	1202.16	0		0	64.326	0	1577.13	1577.13	0		0	0
0.05	111.763	80.929	972.455	1053.38	7.68276		0.05	100.246	65.246	1313.69	1378.94	4.73162		0.05	175.806	111.48	1681.86	1793.34	6.21633		6.21024	1.47558
0.1	142.843	112.009	954.747	1066.76	10.5		0.1	138.499	103.499	1174.58	1278.08	8.09799		0.1	260.727	196.401	1976.38	2172.78	9.03916		9.21237	1.21032
0.25	165.31	134.476	806.07	940.546	14.2977		0.25	156.274	121.274	885.933	1007.21	12.0406		0.25	330.032	265.706	1831.6	2097.3	12.6689		13.0024	1.16488
0.5	229.254	198.42	963.123	1161.54	17.0824		0.5	209.934	174.934	768.267	943.201	18.5468		0.5	424.737	360.411	1520.51	1880.92	19.1614		18.2636	1.06803
1	307.422	276.588	825.949	1102.54	25.0865		1	268.434	233.434	716.589	950.023	24.5714		1	474.408	410.082	1140	1550.08	26.4555		25.3711	0.973765
2	325.826	294.992	617.3	912.292	32.3353		2	258.614	223.614	626.752	850.366	26.2962		2	546.372	482.046	912.195	1394.24	34.5741		31.0685	4.28185

## Sheet: SopA-His Raw Data
Alone							Alone							Alone
[SopA-His] (uM)	Pi	Pi - Bgnd	ATP	Total ATP	% Hydrolyzed		[SopA-His] (uM)	Pi	Pi - Bgnd	ATP	Total ATP	% Hydrolyzed		[SopA-His] (uM)	Pi	Pi - Bgnd	ATP	Total ATP	% Hydrolyzed		AVG	StdDev
0	59.281	0	449.1	449.1	0		0	25	0	798.203	798.203	0		0	51.97	0	105.907	105.907	0		0	0
0.05	88.162	28.881	1539.43	1568.32	1.84153		0.05	39	14	876.404	890.404	1.57232		0.05	53.981	2.011	116.842	118.853	1.69201		1.70195	0.134881
0.1	119.717	60.436	1407.61	1468.05	4.11676		0.1	45.373	20.373	865.442	885.815	2.29992		0.1	53	1.03	125.137	126.167	0.816378		2.41102	1.65299
0.25	99.1	39.819	1521.47	1561.29	2.55039		0.25	40.341	15.341	694.627	709.968	2.1608		0.25	59.019	7.049	123.268	1245.33	0.566036		1.75908	1.05141
0.5	93.12	33.839	1542.52	1576.36	2.14666		0.5	44.965	19.965	758.359	778.324	2.56513		0.5	64	12.03	125.432	1609.46	0.747457		1.81975	0.951911
1	126.768	67.487	1597.05	1664.54	4.0544		1	40.265	15.265	698.471	713.736	2.13875		1	60.904	8.934	125.893	134.827	6.62627		4.27314	2.25174
2	105.588	46.307	1302.64	1348.95	3.43282		2	38.469	13.469	652.426	665.895	2.02269		2	63	11.03	91	102.03	10.8105		5.42202	4.71956
+DNA							+DNA							+DNA
[SopA-His] (uM)	Pi	Pi - Bgnd	ATP	Total ATP	% Hydrolyzed		[SopA-His] (uM)	Pi	Pi - Bgnd	ATP	Total ATP	% Hydrolyzed		[SopA-His] (uM)	Pi	Pi - Bgnd	ATP	Total ATP	% Hydrolyzed
0	59	0	2833.17	2833.17	0		0	25	0	764.692	764.692	0		0	52	0	106	106	0		0	0
0.05	113.812	54.812	1446.17	1500.98	3.65174		0.05	36.71	11.71	867.146	878.856	1.33241		0.05	54	2	105.571	107.571	1.85924		2.28113	1.21586
0.1	119.857	60.857	1250.92	1311.78	4.63928		0.1	50.426	25.426	855.647	881.073	2.8858		0.1	59	7	112.278	119.278	5.86864		4.46457	1.49908
0.25	132.49	73.49	1200.58	1274.07	5.76813		0.25	68.17	43.17	809.83	853	5.06096		0.25	58	6	128.093	134.093	4.47451		5.1012	0.647749
0.5	116.348	57.348	1437.28	1494.62	3.83695		0.5	40.617	15.617	753.166	768.783	2.03139		0.5	65.398	13.398	157.064	170.462	7.85982		4.57605	2.98368
1	123.387	64.387	1350.23	1414.62	4.55155		1	47.735	22.735	726.099	748.834	3.03605		1	59.217	7.217	175.814	183.031	3.94305		3.84355	0.76263
2	185.518	126.518	1377.85	1504.37	8.41002		2	79.818	54.818	698.77	753.588	7.27427		2	62.665	10.665	135.692	146.357	7.28698		7.65709	0.65209

## Sheet: P1 ParA Raw Data
Alone							Alone							Alone
[P1 ParA] (uM)	Pi	Pi - Bgnd	ATP	Total ATP	% Hydrolyzed		[P1 ParA] (uM)	Pi	Pi - Bgnd	ATP	Total ATP	% Hydrolyzed		[P1 ParA] (uM)	Pi	Pi - Bgnd	ATP	Total ATP	% Hydrolyzed		AVG	StdDev
0	59	0	972.932	972.932	0		0	90.816	0	840	840	0		0	224.77	0	1644.22	1644.22	0		0	0
0.05	104.695	45.695	1039.79	1085.48	4.20965		0.05	104.293	13.477	953.931	967.408	1.3931		0.05	247.818	23.048	1819.68	1842.73	1.25076		2.2845	1.66875
0.1	106.362	47.362	1003	1050.36	4.50911		0.1	148.084	57.268	814.611	871.879	6.56834		0.1	321.278	96.508	2140.93	2237.44	4.31332		5.13026	1.24926
0.25	142.55	83.55	881.134	964.684	8.66087		0.25	134.384	43.568	797.305	840.873	5.18128		0.25	287.157	62.387	1832.62	1895.01	3.29217		5.71144	2.72333
0.5	112.864	53.864	1025.53	1079.39	4.99021		0.5	108.082	17.266	853.8	871.066	1.98217		0.5	238.61	13.84	1947.77	1961.61	0.705543		2.55931	2.19987
1	127	68	953.921	1021.92	6.65413		1	161.924	71.108	935.016	1006.12	7.06752		1	292.89	68.12	1997.51	2065.63	3.29778		5.67314	2.06748
2	195.975	136.975	918.948	1055.92	12.9721		2	156.202	65.386	838.783	904.169	7.23161		2	363.774	139.004	2180.11	2319.11	5.99384		8.73251	3.72336
+DNA							+DNA							+DNA
[P1 ParA] (uM)	Pi	Pi - Bgnd	ATP	Total ATP	% Hydrolyzed		[P1 ParA] (uM)	Pi	Pi - Bgnd	ATP	Total ATP	% Hydrolyzed		[P1 ParA] (uM)	Pi	Pi - Bgnd	ATP	Total ATP	% Hydrolyzed
0	59	0	928.931	928.931	0		0	60	0	717.746	717.746	0		0	123.972	0	940.534	940.534	0		0	0
0.05	95.194	36.194	1006.85	1043.04	3.47005		0.05	90	30	675.175	705.175	4.25426		0.05	176	52.028	1682	1734.03	3.00041		3.57491	0.633468
0.1	99.507	40.507	888.115	928.622	4.36205		0.1	162.065	102.065	794.977	897.042	11.378		0.1	261	137.028	1976	2113.03	6.48491		7.40831	3.59794
0.25	149.799	90.799	898.956	989.755	9.17389		0.25	144.471	84.471	845.987	930.458	9.07843		0.25	257.318	133.346	1769.47	1902.82	7.00782		8.42005	1.22395
0.5	116.53	57.53	895.049	952.579	6.03939		0.5	152.168	92.168	806.508	898.676	10.256		0.5	270.125	146.153	2250.93	2397.08	6.09712		7.46416	2.41795
1	143.916	84.916	911.533	996.449	8.52186		1	162.467	102.467	903.526	1005.99	10.1857		1	263.23	139.258	1634.22	1773.48	7.85226		8.85326	1.20148
2	150.458	91.458	529.491	620.949	14.7287		2	179.122	119.122	932.579	1051.7	11.3266		2	395.336	271.364	1723.23	1994.6	13.605		13.2201	1.73342

## Sheet: AVG_StdDev n=3
Alone				% Hydrolyzed		ATP hydrolyzed (nmol)		Specific Activity (mol ATP/min/mol His-MBP-McdA)			1hr incubation at 30oC
[His-MBP-McdA] (uM)	[His-MBP-McdA] (nmol)	Total ATP (nmol)	Reaction Volume (ul)	AVG	STD DEV	AVG	STD DEV	AVG	STD DEV		1mM ATP x 20ul Reaction volume = 20nmol ATP substrate
0	0	20	20	0	0	0	0	--	--
0.05	0.001	20	20	4.23172	2.38215	0.846344	0.476431	14.1057	0.0113493
0.1	0.002	20	20	8.25613	3.70382	1.65123	0.740764	13.7602	0.0274366
0.25	0.005	20	20	13.5822	2.75897	2.71645	0.551795	9.05483	0.0152239
0.5	0.01	20	20	14.8606	3.03814	2.97213	0.607629	4.95355	0.0184606
1	0.02	20	20	20.3746	1.27109	4.07492	0.254217	3.39577	0.00323133
2	0.04	20	20	25.9841	0.326902	5.19683	0.0653804	2.16535	0.00021373
+DNA
[His-MBP-McdA]				+DNA
0	0	20	20	0	0	0	0	--	--
0.05	0.001	20	20	6.21024	1.47558	1.24205	0.295117	20.7008	0.00435469
0.1	0.002	20	20	9.21237	1.21032	1.84247	0.242064	15.3539	0.00292975
0.25	0.005	20	20	13.0024	1.16488	2.60048	0.232976	8.66827	0.0027139
0.5	0.01	20	20	18.2636	1.06803	3.65271	0.213607	6.08785	0.00228139
1	0.02	20	20	25.3711	0.973765	5.07423	0.194753	4.22852	0.00189644
2	0.04	20	20	31.0685	4.28185	6.2137	0.856371	2.58904	0.0366686
Alone
[SopA-His]	[SopA-His]	Total ATP (nmol)	Reaction Volume (ul)	% Hydrolyzed		ATP hydrolyzed (nmol)		Specific Activity (mol ATP/min/mol SopA-His)
0	0	20	20	0	0	0	0	--	--
0.05	0.001	20	20	1.70195	0.134881	0.34039	0.0269761	5.67317	3.63856e-05
0.1	0.002	20	20	2.41102	1.65299	0.482204	0.330599	4.01836	0.00546477
0.25	0.005	20	20	1.75908	1.05141	0.351815	0.210281	1.17272	0.00221091
0.5	0.01	20	20	1.81975	0.951911	0.363949	0.190382	0.606582	0.00181227
1	0.02	20	20	4.27314	2.25174	0.854628	0.450349	0.71219	0.0101407
2	0.04	20	20	5.42202	4.71956	1.0844	0.943913	0.451835	0.0445486
DNA
[SopA-His]	[SopA-His]
0	0	20	20	0	0	0	0	--	--
0.05	0.001	20	20	2.28113	1.21586	0.456226	0.243172	7.60377	0.00295663
0.1	0.002	20	20	4.46457	1.49908	0.892915	0.299815	7.44095	0.00449446
0.25	0.005	20	20	5.1012	0.647749	1.02024	0.12955	3.4008	0.000839158
0.5	0.01	20	20	4.57605	2.98368	0.915211	0.596736	1.52535	0.0178047
1	0.02	20	20	3.84355	0.76263	0.76871	0.152526	0.640592	0.00116321
2	0.04	20	20	7.65709	0.65209	1.53142	0.130418	0.638091	0.000850443
Alone				% Hydrolyzed		ATP hydrolyzed (nmol)		Specific Activity (mol ATP/min/mol P1 ParA)
[P1 ParA] (uM)	[P1 ParA] (nmol)	Total ATP (nmol)	Reaction Volume (ul)	AVG	STD DEV	AVG	STD DEV	AVG	STD DEV
0	0	20	20	0	0	0	0	--	--
0.05	0.001	20	20	2.2845	1.66875	0.456901	0.333749	7.61502	0.00556943
0.1	0.002	20	20	5.13026	1.24926	1.02605	0.249852	8.55043	0.0031213
0.25	0.005	20	20	5.71144	2.72333	1.14229	0.544666	3.80763	0.0148331
0.5	0.01	20	20	2.55931	2.19987	0.511862	0.439973	0.853103	0.00967883
1	0.02	20	20	5.67314	2.06748	1.13463	0.413497	0.945524	0.00854897
2	0.04	20	20	8.73251	3.72336	1.7465	0.744672	0.727709	0.0277268
+DNA
[P1 ParA]				+DNA
0	0	20	20	0	0	0	0	--	--
0.05	0.001	20	20	3.57491	0.633468	0.714982	0.126694	11.9164	0.000802563
0.1	0.002	20	20	7.40831	3.59794	1.48166	0.719589	12.3472	0.0258904
0.25	0.005	20	20	8.42005	1.22395	1.68401	0.244791	5.61336	0.00299613
0.5	0.01	20	20	7.46416	2.41795	1.49283	0.48359	2.48805	0.011693
1	0.02	20	20	8.85326	1.20148	1.77065	0.240296	1.47554	0.00288711
2	0.04	20	20	13.2201	1.73342	2.64402	0.346683	1.10168	0.00600946
