# Supplementary material for: Protein gradients on the nucleoid position the carbon-fixing organelles of cyanobacteria
Source: eLife journal article supplement (doi:10.7554/elife.39723), 2018-12-06
Supplement: supp [file elife-39723-supp-v1.zip › elife_poa_e39723_Figure_2_figure_supplement_1_source_data_2.xlsx]

## Sheet: P1 ParA vs SopA 3HR Raw Data
Alone							Alone							Alone
P1 ParA (uM)	Pi	Pi - Bgnd	ATP	Total ATP	% Hydrolyzed		P1 ParA (uM)	Pi	Pi - Bgnd	ATP	Total ATP	% Hydrolyzed		P1 ParA (uM)	Pi	Pi - Bgnd	ATP	Total ATP	% Hydrolyzed		AVG	StdDev
0	27.781	0	521.442	521.442	0		0	41.552	0	724.815	724.815	0		0	20.161	0	215.94	215.94	0		0	0
1	36	8.219	824.667	832.886	0.98681		1	47.477	5.925	692.778	698.703	0.848		1	22.313	2.152	307.797	309.949	0.694308		0.843039	0.146314
5	48	20.219	458.151	478.37	4.22664		5	84	42.448	730	772.448	5.49526		5	35.647	15.486	232.164	362.796	4.26851		4.66347	0.720651
10	88	60.219	445	505.219	11.9194		10	112	70.448	634.17	704.618	9.99804		10	63.831	43.67	435	478.67	9.1232		10.3469	1.43036
With DNA							With DNA							With DNA
P1 ParA (uM)	Pi	Pi - Bgnd	ATP	Total ATP	% Hydrolyzed		P1 ParA (uM)	Pi	Pi - Bgnd	ATP	Total ATP	% Hydrolyzed		P1 ParA (uM)	Pi	Pi - Bgnd	ATP	Total ATP	% Hydrolyzed		AVG	StdDev
0	59.528	0	805.099	805.099	0		0	56.822	0	663.954	663.954	0		0	19.498	0	75.35	75.35	0		0	0
1	70.257	10.729	824.809	835.538	1.28408		1	66.404	9.582	740.668	750.25	1.27717		1	22.979	3.481	162	165.481	2.10356		1.55494	0.475135
5	123.283	63.755	751.048	814.803	7.82459		5	92	35.178	431.112	466.29	7.54423		5	45	25.502	470.915	362.796	7.02929		7.46604	0.403373
10	110.562	51.034	249.47	300.504	16.9828		10	81.492	24.67	107.63	132.3	18.647		10	94.746	75.248	390	465.248	16.1737		17.2679	1.26104
Alone							Alone							Alone
[SopA-His] (uM)	Pi	Pi - Bgnd	ATP	Total ATP	% Hydrolyzed		[SopA-His] (uM)	Pi	Pi - Bgnd	ATP	Total ATP	% Hydrolyzed		[SopA-His] (uM)	Pi	Pi - Bgnd	ATP	Total ATP	% Hydrolyzed		AVG	StdDev
0	35	0	488	488	0		0	40	0	234	234	0		0	26.48	0	199.913	199.913	0		0	0
1	38.9	3.9	477.295	481.195	0.810482		1	42.024	2.024	215.431	217.455	0.930767		1	32	5.52	525	530.52	1.04049		0.927246	0.115044
5	51	16	410.379	426.379	3.75253		5	51	11	231.975	242.975	4.52721		5	49	22.52	411	362.796	6.20735		4.82903	1.25493
10	89	54	390	444	12.1622		10	78	38	221	259	14.6718		10	99.846	73.366	435	508.366	14.4317		13.7552	1.38485
With DNA							With DNA							With DNA
[SopA-His] (uM)	Pi	Pi - Bgnd	ATP	Total ATP	% Hydrolyzed		[SopA-His] (uM)	Pi	Pi - Bgnd	ATP	Total ATP	% Hydrolyzed		[SopA-His] (uM)	Pi	Pi - Bgnd	ATP	Total ATP	% Hydrolyzed		AVG	StdDev
0	26	0	250	250	0		0	50	0	194	194	0		0	68	0	100.024	100.024	0		0	0
1	29.386	3.386	230.273	233.659	1.44912		1	60	3.178	206.44	209.618	1.51609		1	70.8	2.8	148.862	151.662	1.84621		1.60381	0.212581
5	38	12	179.452	191.452	6.26789		5	77	20.178	245	265.178	7.60923		5	114.751	46.751	96.529	362.796	12.8863		8.92114	3.49881
10	63	37	182.19	219.19	16.8803		10	97	40.178	222.777	262.955	15.2794		10	105.723	37.723	180	217.723	17.3261		16.4953	1.07632

## Sheet: AVG_StdDev n=3
Alone				% Hydrolyzed		ATP hydrolyzed (nmol)		Specific Activity (mol ATP/min/mol P1 ParA)			3hr incubation at 30oC
[P1 ParA] (uM)	[P1 ParA] (nmol)	Total ATP (nmol)	Reaction Volume (ul)	AVG	STD DEV	AVG	STD DEV	AVG	STD DEV		1mM ATP x 20ul Reaction volume = 20nmol ATP substrate
0	0	20	20	0	0	0	0	--	--
1	0.02	20	20	0.843039	0.146314	0.168608	0.0292628	0.0468355	0.00812856
5	0.1	20	20	4.66347	0.720651	0.932694	0.14413	0.0518164	0.00800723
10	0.2	20	20	10.3469	1.43036	2.06937	0.286072	0.0574826	0.00794645
With DNA				% Hydrolyzed		ATP hydrolyzed (nmol)		Specific Activity (mol ATP/min/mol P1 ParA)
[P1 ParA] (uM)	[P1 ParA] (nmol)	Total ATP (nmol)	Reaction Volume (ul)	AVG	STD DEV	AVG	STD DEV	AVG	STD DEV
0	0	20	20	0	0	0	0	--	--
1	0.02	20	20	1.55494	0.475135	0.310988	0.095027	0.0863856	0.0263964
5	0.1	20	20	7.46604	0.403373	1.49321	0.0806745	0.082956	0.00448192
10	0.2	20	20	17.2679	1.26104	3.45357	0.252207	0.0959325	0.00700576
Alone				% Hydrolyzed		ATP hydrolyzed (nmol)		Specific Activity (mol ATP/min/mol SopA-His)
[SopA-His] (uM)	[SopA-His] (nmol)	Total ATP (nmol)	Reaction Volume (ul)	AVG	STD DEV	AVG	STD DEV	AVG	STD DEV
0	0	20	20	0	0	0	0	--	--
1	0.02	20	20	0.927246	0.115044	0.185449	0.0230087	0.0515137	0.00639131
5	0.1	20	20	4.82903	1.25493	0.965806	0.250986	0.0536559	0.0139437
10	0.2	20	20	13.7552	1.38485	2.75105	0.276971	0.076418	0.00769363
With DNA				% Hydrolyzed		ATP hydrolyzed (nmol)		Specific Activity (mol ATP/min/mol SopA-His)
[SopA-His] (uM)	[SopA-His] (nmol)	Total ATP (nmol)	Reaction Volume (ul)	AVG	STD DEV	AVG	STD DEV	AVG	STD DEV
0	0	20	20	0	0	0	0	--	--
1	0.02	20	20	1.60381	0.212581	0.320761	0.0425162	0.0891004	0.0118101
5	0.1	20	20	8.92114	3.49881	1.78423	0.699763	0.0991238	0.0388757
10	0.2	20	20	16.4953	1.07632	3.29906	0.215263	0.0916405	0.00597954
