# Supplementary material for: Protein gradients on the nucleoid position the carbon-fixing organelles of cyanobacteria
Source: eLife journal article supplement (doi:10.7554/elife.39723), 2018-12-06
Supplement: supp [file elife-39723-supp-v1.zip › elife_poa_e39723_Figure_2_figure_supplement_1_source_data_3.xlsx]

## Sheet: Raw Data
Alone
[McdA-GFP-His] (uM)	Pi	Pi - Bgnd	ATP	Total ATP	% Hydrolyzed		[McdA-GFP-His] (uM)	Pi	Pi - Bgnd	ATP	Total ATP	% Hydrolyzed		AVG	STD DEV
0	87.1	0	423.5	423.5	0		0	83.9	0	487.4	487.4	0		0	0
0.05	111.5	24.4	551.1	575.5	4.23979		0.05	108.4	24.5	558.9	583.4	4.19952		4.21966	0.0284762
0.1	117.3	30.2	545.7	575.9	5.24397		0.1	107.1	23.2	547.4	570.6	4.0659		4.65493	0.833022
0.25	129.6	42.5	549.7	592.2	7.17663		0.25	115.5	31.6	549.1	580.7	5.44171		6.30917	1.22677
0.5	133.7	46.6	526.3	572.9	8.13405		0.5	129.6	45.7	483	528.7	8.64384		8.38895	0.360475
1	134.2	47.1	498.5	545.6	8.6327		1	147.4	63.5	507.4	570.9	11.1228		9.87774	1.76076
2	177.9	90.8	497.3	588.1	15.4396		2	155.4	71.5	495.9	567.4	12.6013		14.0204	2.00692
+DNA
0	99.6	0	523.3	523.3	0		0	93.9	0	581.8	581.8	0		0	0
0.05	126	26.4	573.7	600.1	4.39927		0.05	127.2	33.3	562.4	595.7	5.59006		4.99466	0.842019
0.1	145.8	46.2	561.2	607.4	7.60619		0.1	135.4	41.5	573.1	614.6	6.75236		7.17927	0.60375
0.25	203	103.4	550.4	653.8	15.8152		0.25	195.2	101.3	566.9	668.2	15.1601		15.4877	0.463227
0.5	242.9	143.3	497.1	640.4	22.3766		0.5	242.7	148.8	505	653.8	22.7593		22.5679	0.270549
1	317.2	217.6	473.7	691.3	31.4769		1	333.2	239.3	489.6	728.9	32.8303		32.1536	0.956973
2	336.5	236.9	420.8	657.7	36.0195		2	352.4	258.5	423.3	681.8	37.9143		36.9669	1.33988
+McdB-His
0	107.1	0	550	550	0		0	101.3	0	573.8	573.8	0		0	0
0.05	120.6	13.5	594.7	608.2	2.21966		0.05	119.8	18.5	583.8	602.3	3.07156		2.64561	0.60238
0.1	125.4	18.3	511.2	529.5	3.45609		0.1	129.8	28.5	507.7	536.2	5.31518		4.38564	1.31458
0.25	136.3	29.2	537.1	566.3	5.15628		0.25	139.1	37.8	545.4	583.2	6.48148		5.81888	0.937061
0.5	155.9	48.8	496.6	545.4	8.94756		0.5	163.8	62.5	492.1	554.6	11.2694		10.1085	1.64178
1	169.1	62	455.8	517.8	11.9737		1	187.7	86.4	489.6	576	15		13.4869	2.13989
2	200	92.9	460.6	553.5	16.7841		2	192.5	91.2	483.6	574.8	15.8664		16.3252	0.648921
+DNA+McdB-His
0	121.1	0	378.4	378.4	0		0	117.6	0	487.3	487.3	0		0	0
0.05	161.2	40.1	468.2	508.3	7.88904		0.05	157.2	39.6	496.8	536.4	7.38255		7.6358	0.358144
0.1	170.5	49.4	480	529.4	9.33132		0.1	179.8	62.2	515.5	577.7	10.7668		10.0491	1.01506
0.25	213.9	92.8	469.7	562.5	16.4978		0.25	192	74.4	481.5	555.9	13.3837		14.9407	2.20198
0.5	230.5	109.4	440.2	549.6	19.9054		0.5	244.9	127.3	455	582.3	21.8616		20.8835	1.38324
1	275.1	154	380.6	534.6	28.8066		1	277.1	159.5	415.9	575.4	27.7198		28.2632	0.768439
2	306.1	185	354.7	539.7	34.2783		2	309.8	192.2	392.9	585.1	32.8491		33.5637	1.01061

## Sheet: AVG_StdDev n=2
Alone				% Hydrolyzed		ATP hydrolyzed (nmol)		Specific Activity (mol ATP/min/mol His-MBP-McdA)			1hr incubation at 30oC
[McdA-GFP] (uM)	[McdA-GFP-His] (nmol)	Total ATP (nmol)	Reaction Volume (ul)	AVG	STD DEV	AVG	STD DEV	AVG	STD DEV		1mM ATP x 20ul Reaction volume = 20nmol ATP substrate
0	0	20	20	0	0	0	0	--	--
0.05	0.001	20	20	4.21966	0.0284762	0.843931	0.00569524	14.0655	1.62179e-06
0.1	0.002	20	20	4.65493	0.833022	0.930986	0.166604	7.75822	0.00138785
0.25	0.005	20	20	6.30917	1.22677	1.26183	0.245355	4.20611	0.00300995
0.5	0.01	20	20	8.38895	0.360475	1.67779	0.072095	2.79632	0.000259884
1	0.02	20	20	9.87774	1.76076	1.97555	0.352152	1.64629	0.00620055
2	0.04	20	20	14.0204	2.00692	2.80409	0.401384	1.16837	0.00805545
+DNA
[McdA-GFP] (uM)				+DNA
0	0	20	20	0	0	0	0	--	--
0.05	0.001	20	20	4.99466	0.842019	0.998933	0.168404	16.6489	0.00141799
0.1	0.002	20	20	7.17927	0.60375	1.43585	0.12075	11.9655	0.000729027
0.25	0.005	20	20	15.4877	0.463227	3.09754	0.0926455	10.3251	0.000429159
0.5	0.01	20	20	22.5679	0.270549	4.51359	0.0541098	7.52265	0.000146393
1	0.02	20	20	32.1536	0.956973	6.43072	0.191395	5.35893	0.0018316
2	0.04	20	20	36.9669	1.33988	7.39338	0.267977	3.08058	0.00359058
+McdB-His
[McdA-GFP] (uM)				+McdB-His
0	0	20	20	0	0	0	0	--	--
0.05	0.001	20	20	2.64561	0.60238	0.529122	0.120476	8.81871	0.000725724
0.1	0.002	20	20	4.38564	1.31458	0.877127	0.262915	7.30939	0.00345622
0.25	0.005	20	20	5.81888	0.937061	1.16378	0.187412	3.87925	0.00175617
0.5	0.01	20	20	10.1085	1.64178	2.02169	0.328355	3.36949	0.00539086
1	0.02	20	20	13.4869	2.13989	2.69737	0.427978	2.24781	0.00915828
2	0.04	20	20	16.3252	0.648921	3.26505	0.129784	1.36044	0.000842197
+DNA+McdB-His
[McdA-GFP] (uM)				+DNA+McdB-His
0	0	20	20	0	0	0	0	--	--
0.05	0.001	20	20	7.6358	0.358144	1.52716	0.0716287	25.4527	0.000256534
0.1	0.002	20	20	10.0491	1.01506	2.00982	0.203013	16.7485	0.0020607
0.25	0.005	20	20	14.9407	2.20198	2.98815	0.440397	9.96049	0.00969747
0.5	0.01	20	20	20.8835	1.38324	4.1767	0.276648	6.96116	0.00382671
1	0.02	20	20	28.2632	0.768439	5.65264	0.153688	4.71054	0.001181
2	0.04	20	20	33.5637	1.01061	6.71274	0.202122	2.79697	0.00204266
(Avg and StdDev from n = 2 independent experiments)
