# Supplementary figures and images for: Protein gradients on the nucleoid position the carbon-fixing organelles of cyanobacteria
Source: eLife journal article supplement (doi:10.7554/elife.39723), 2018-12-06

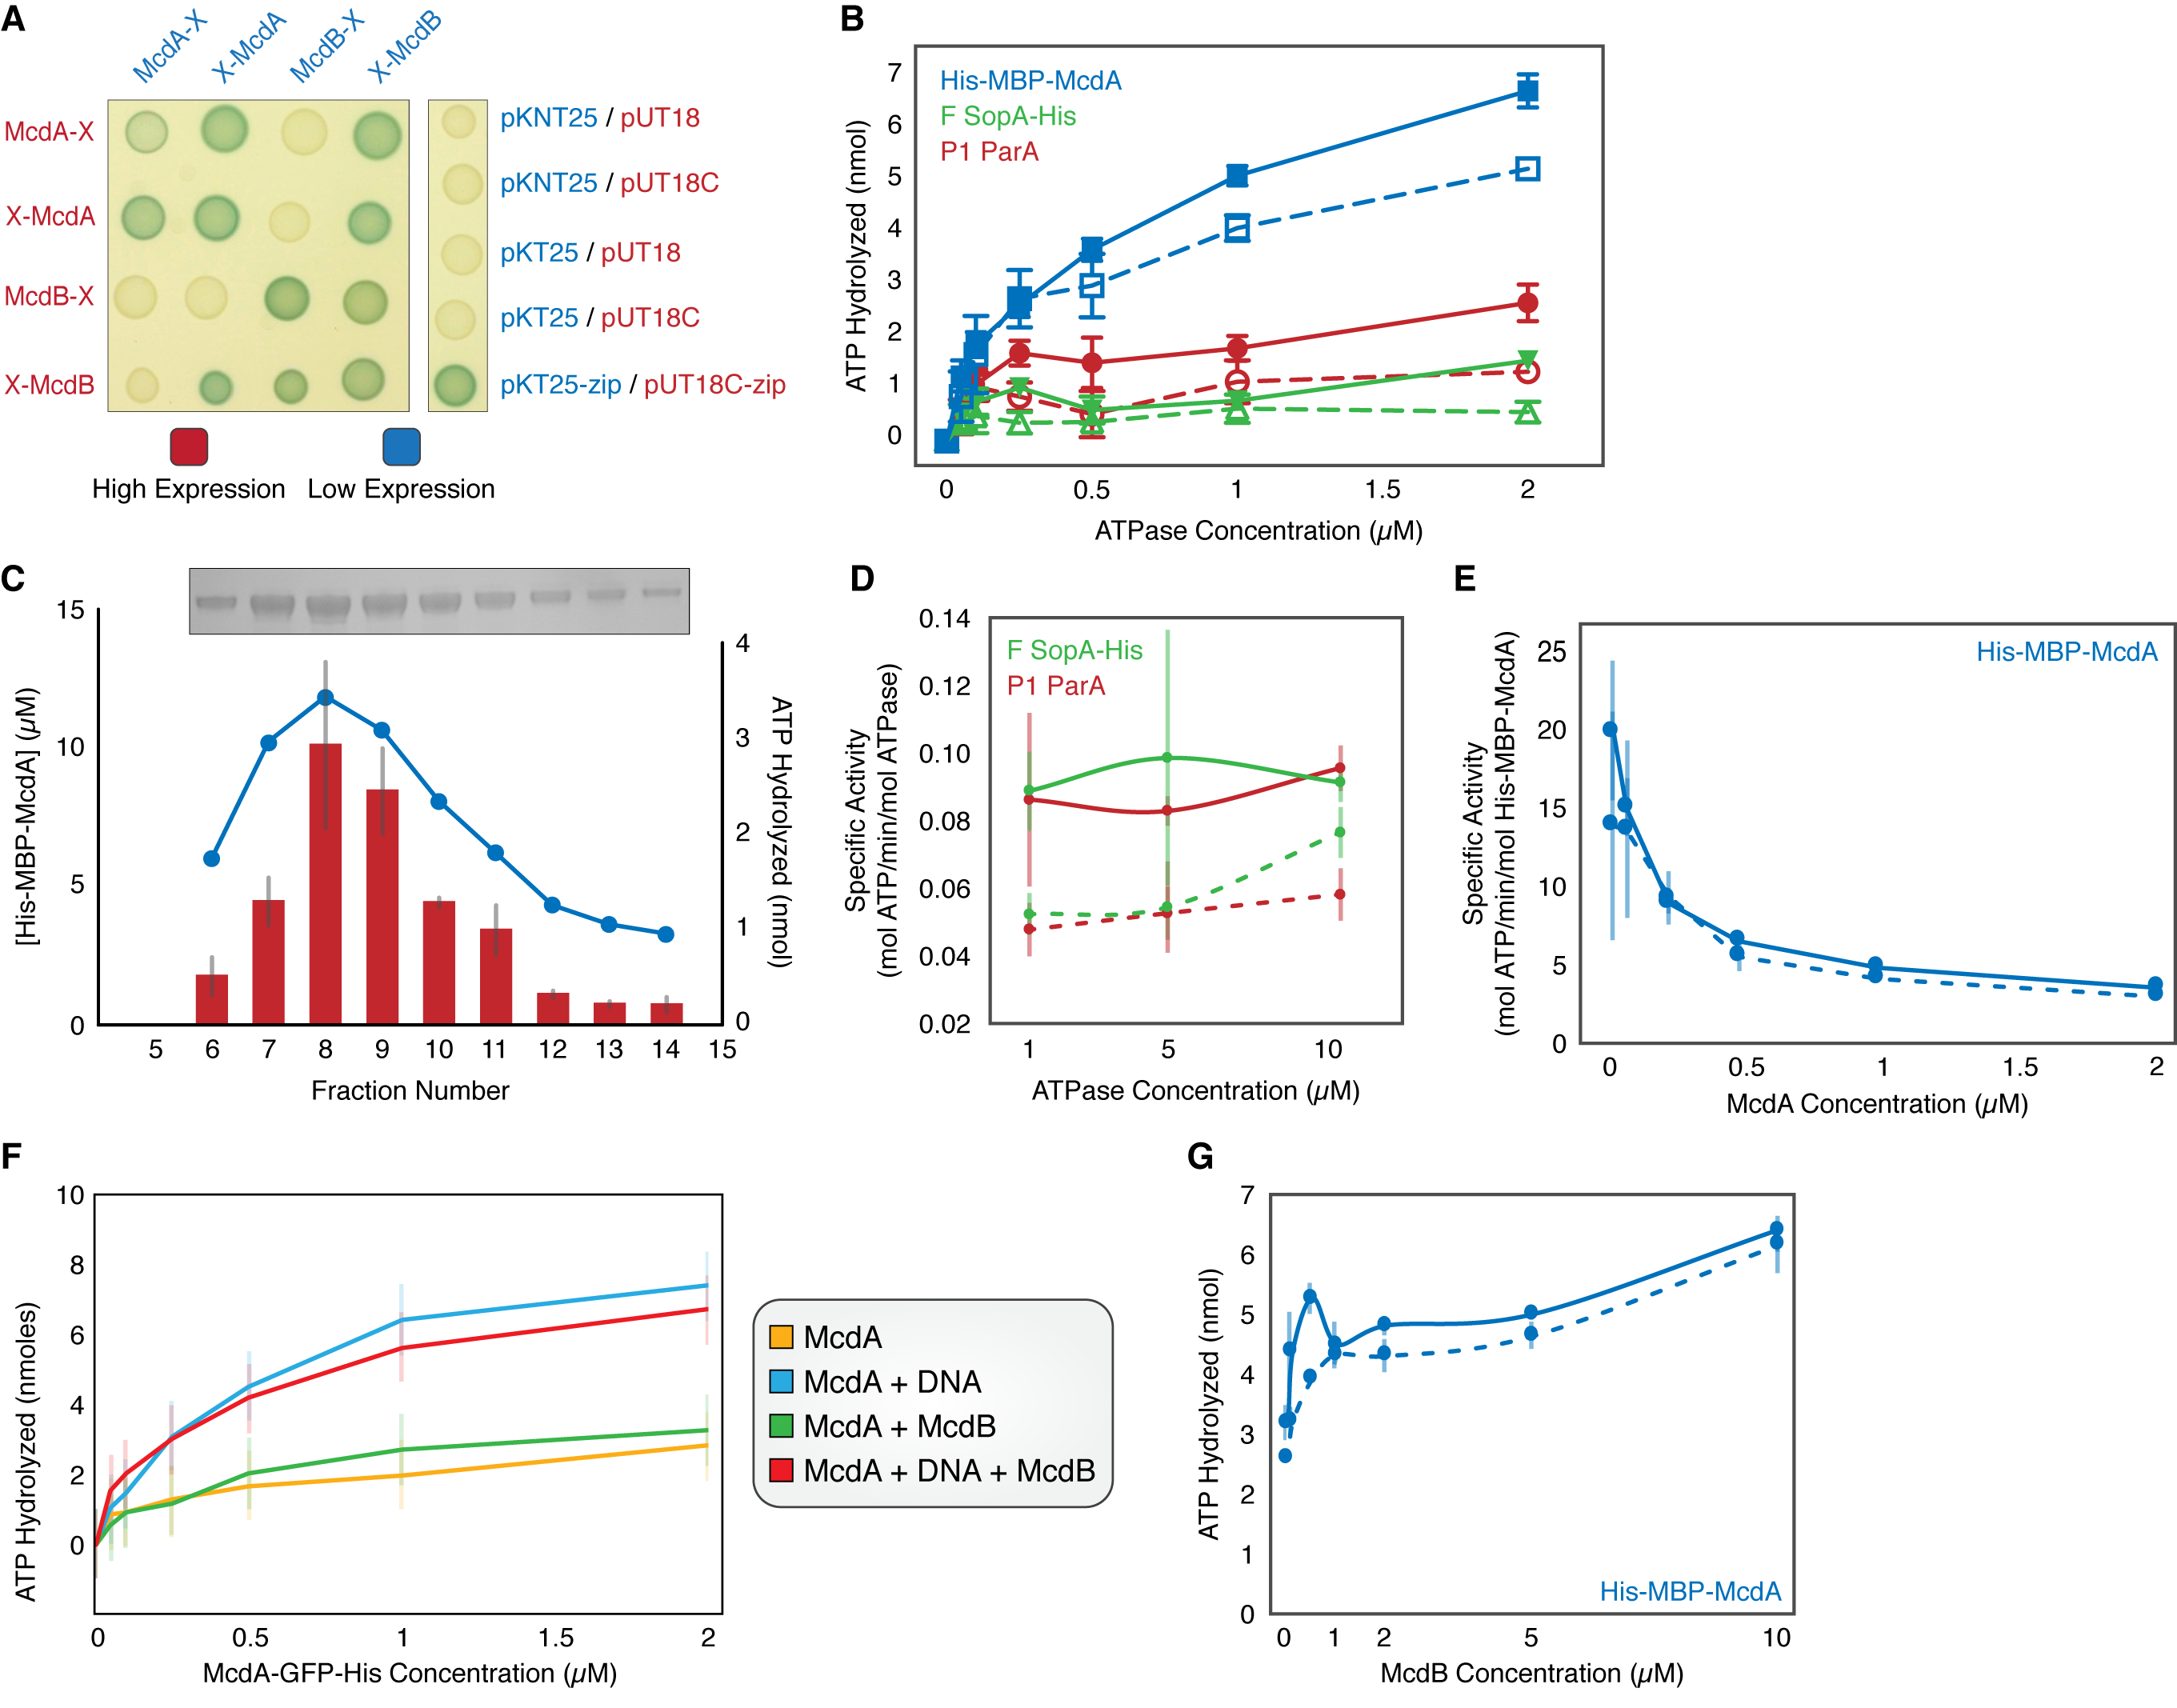

Supplement: supp [file elife-39723-supp-v1.zip › elife_poa_e39723_Figure_2_figure_supplement_1.tif]

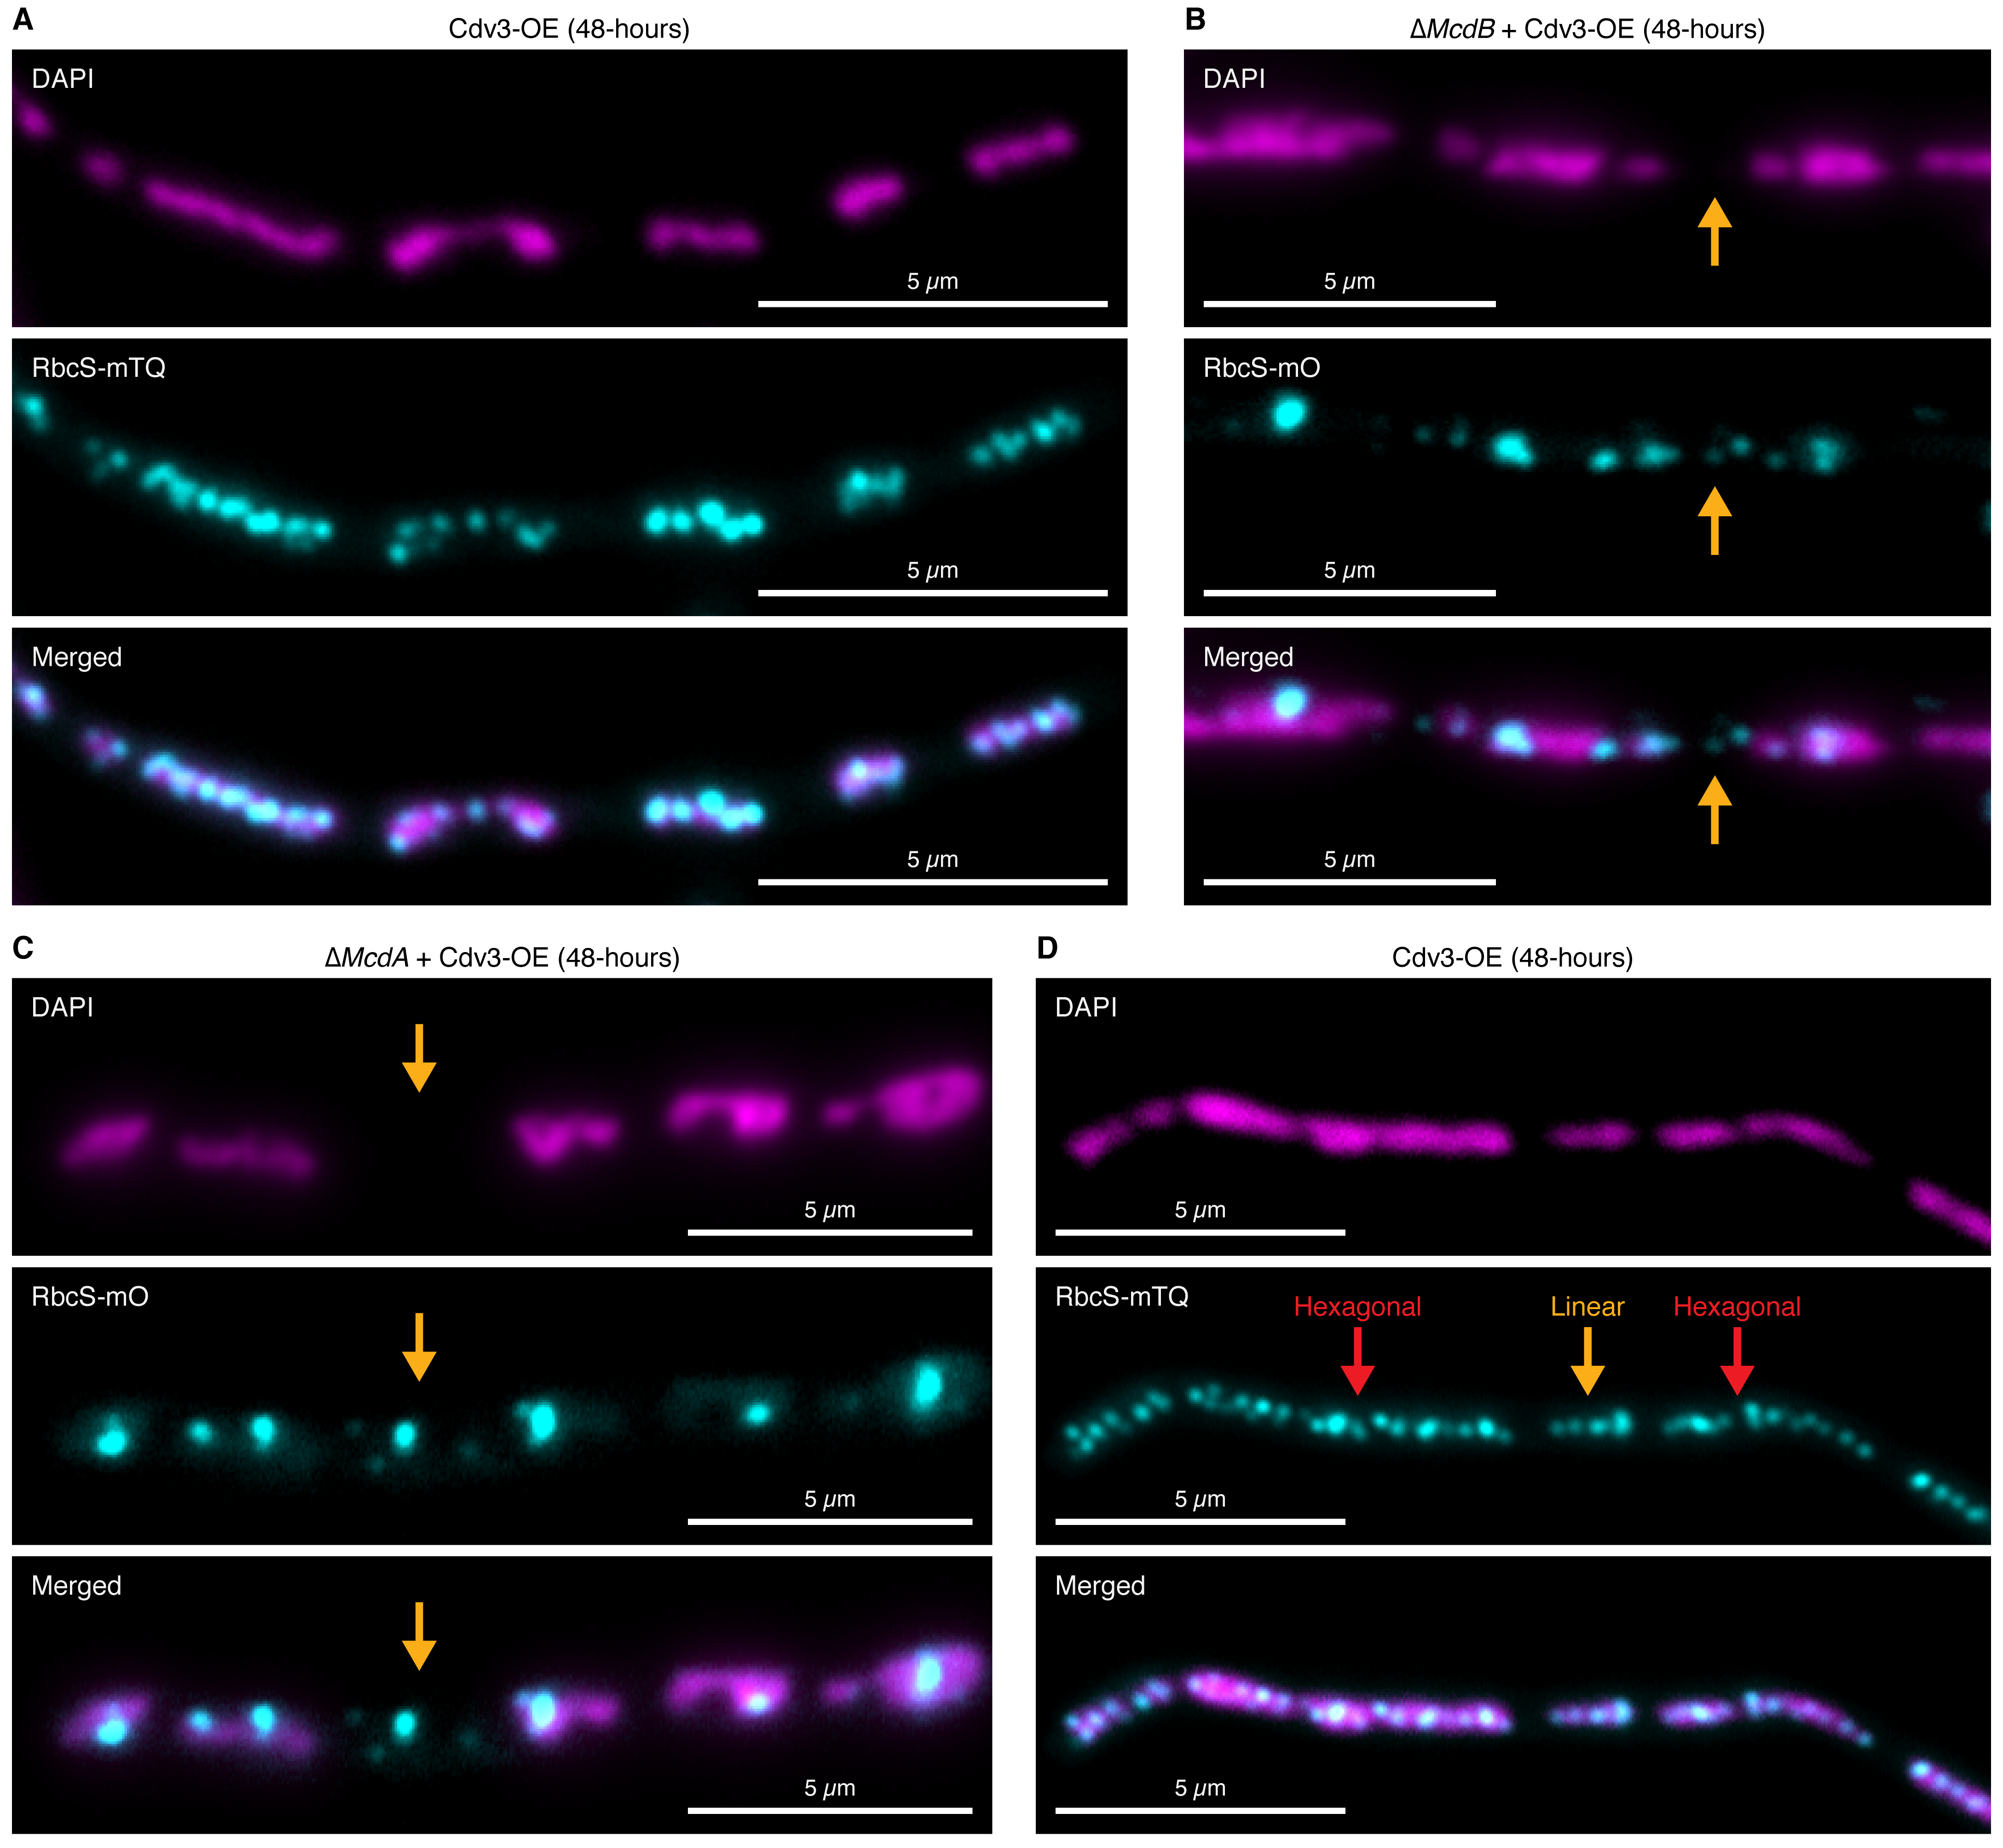

Supplement: supp [file elife-39723-supp-v1.zip › elife_poa_e39723_Figure_7_figure_supplement_1.tif]

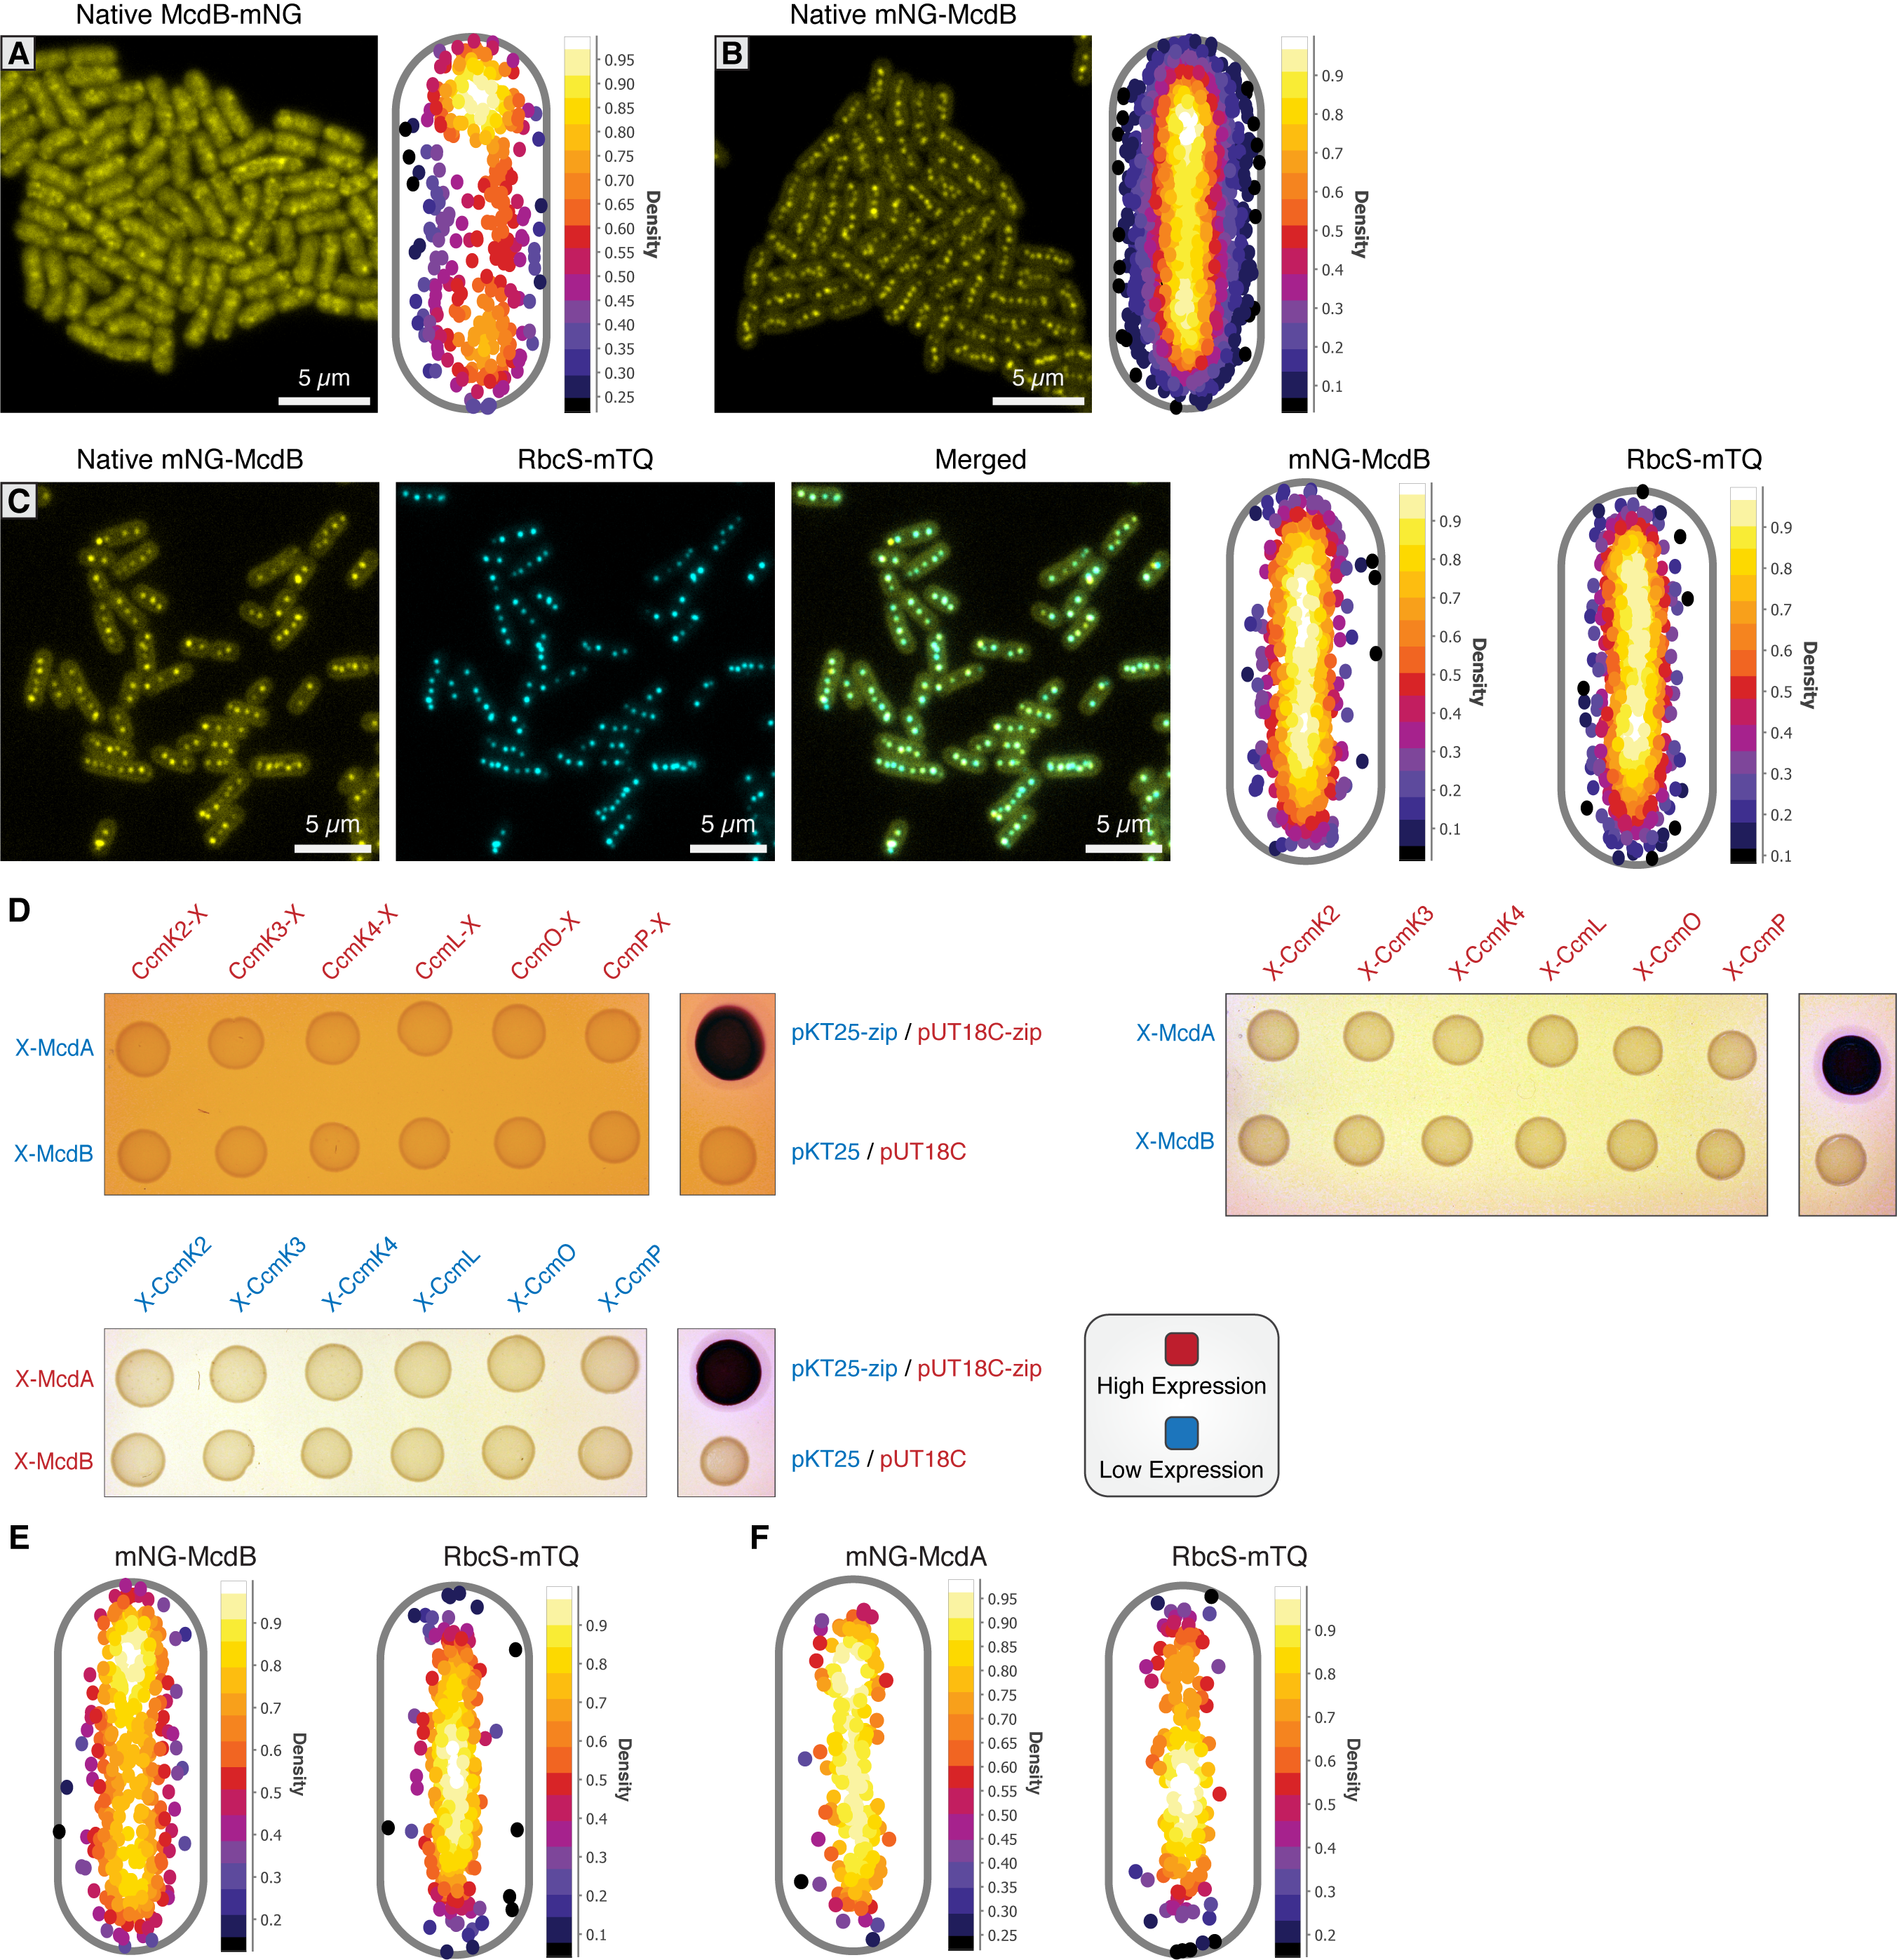

Supplement: supp [file elife-39723-supp-v1.zip › elife_poa_e39723_Figure_3_figure_supplement_1.tif]

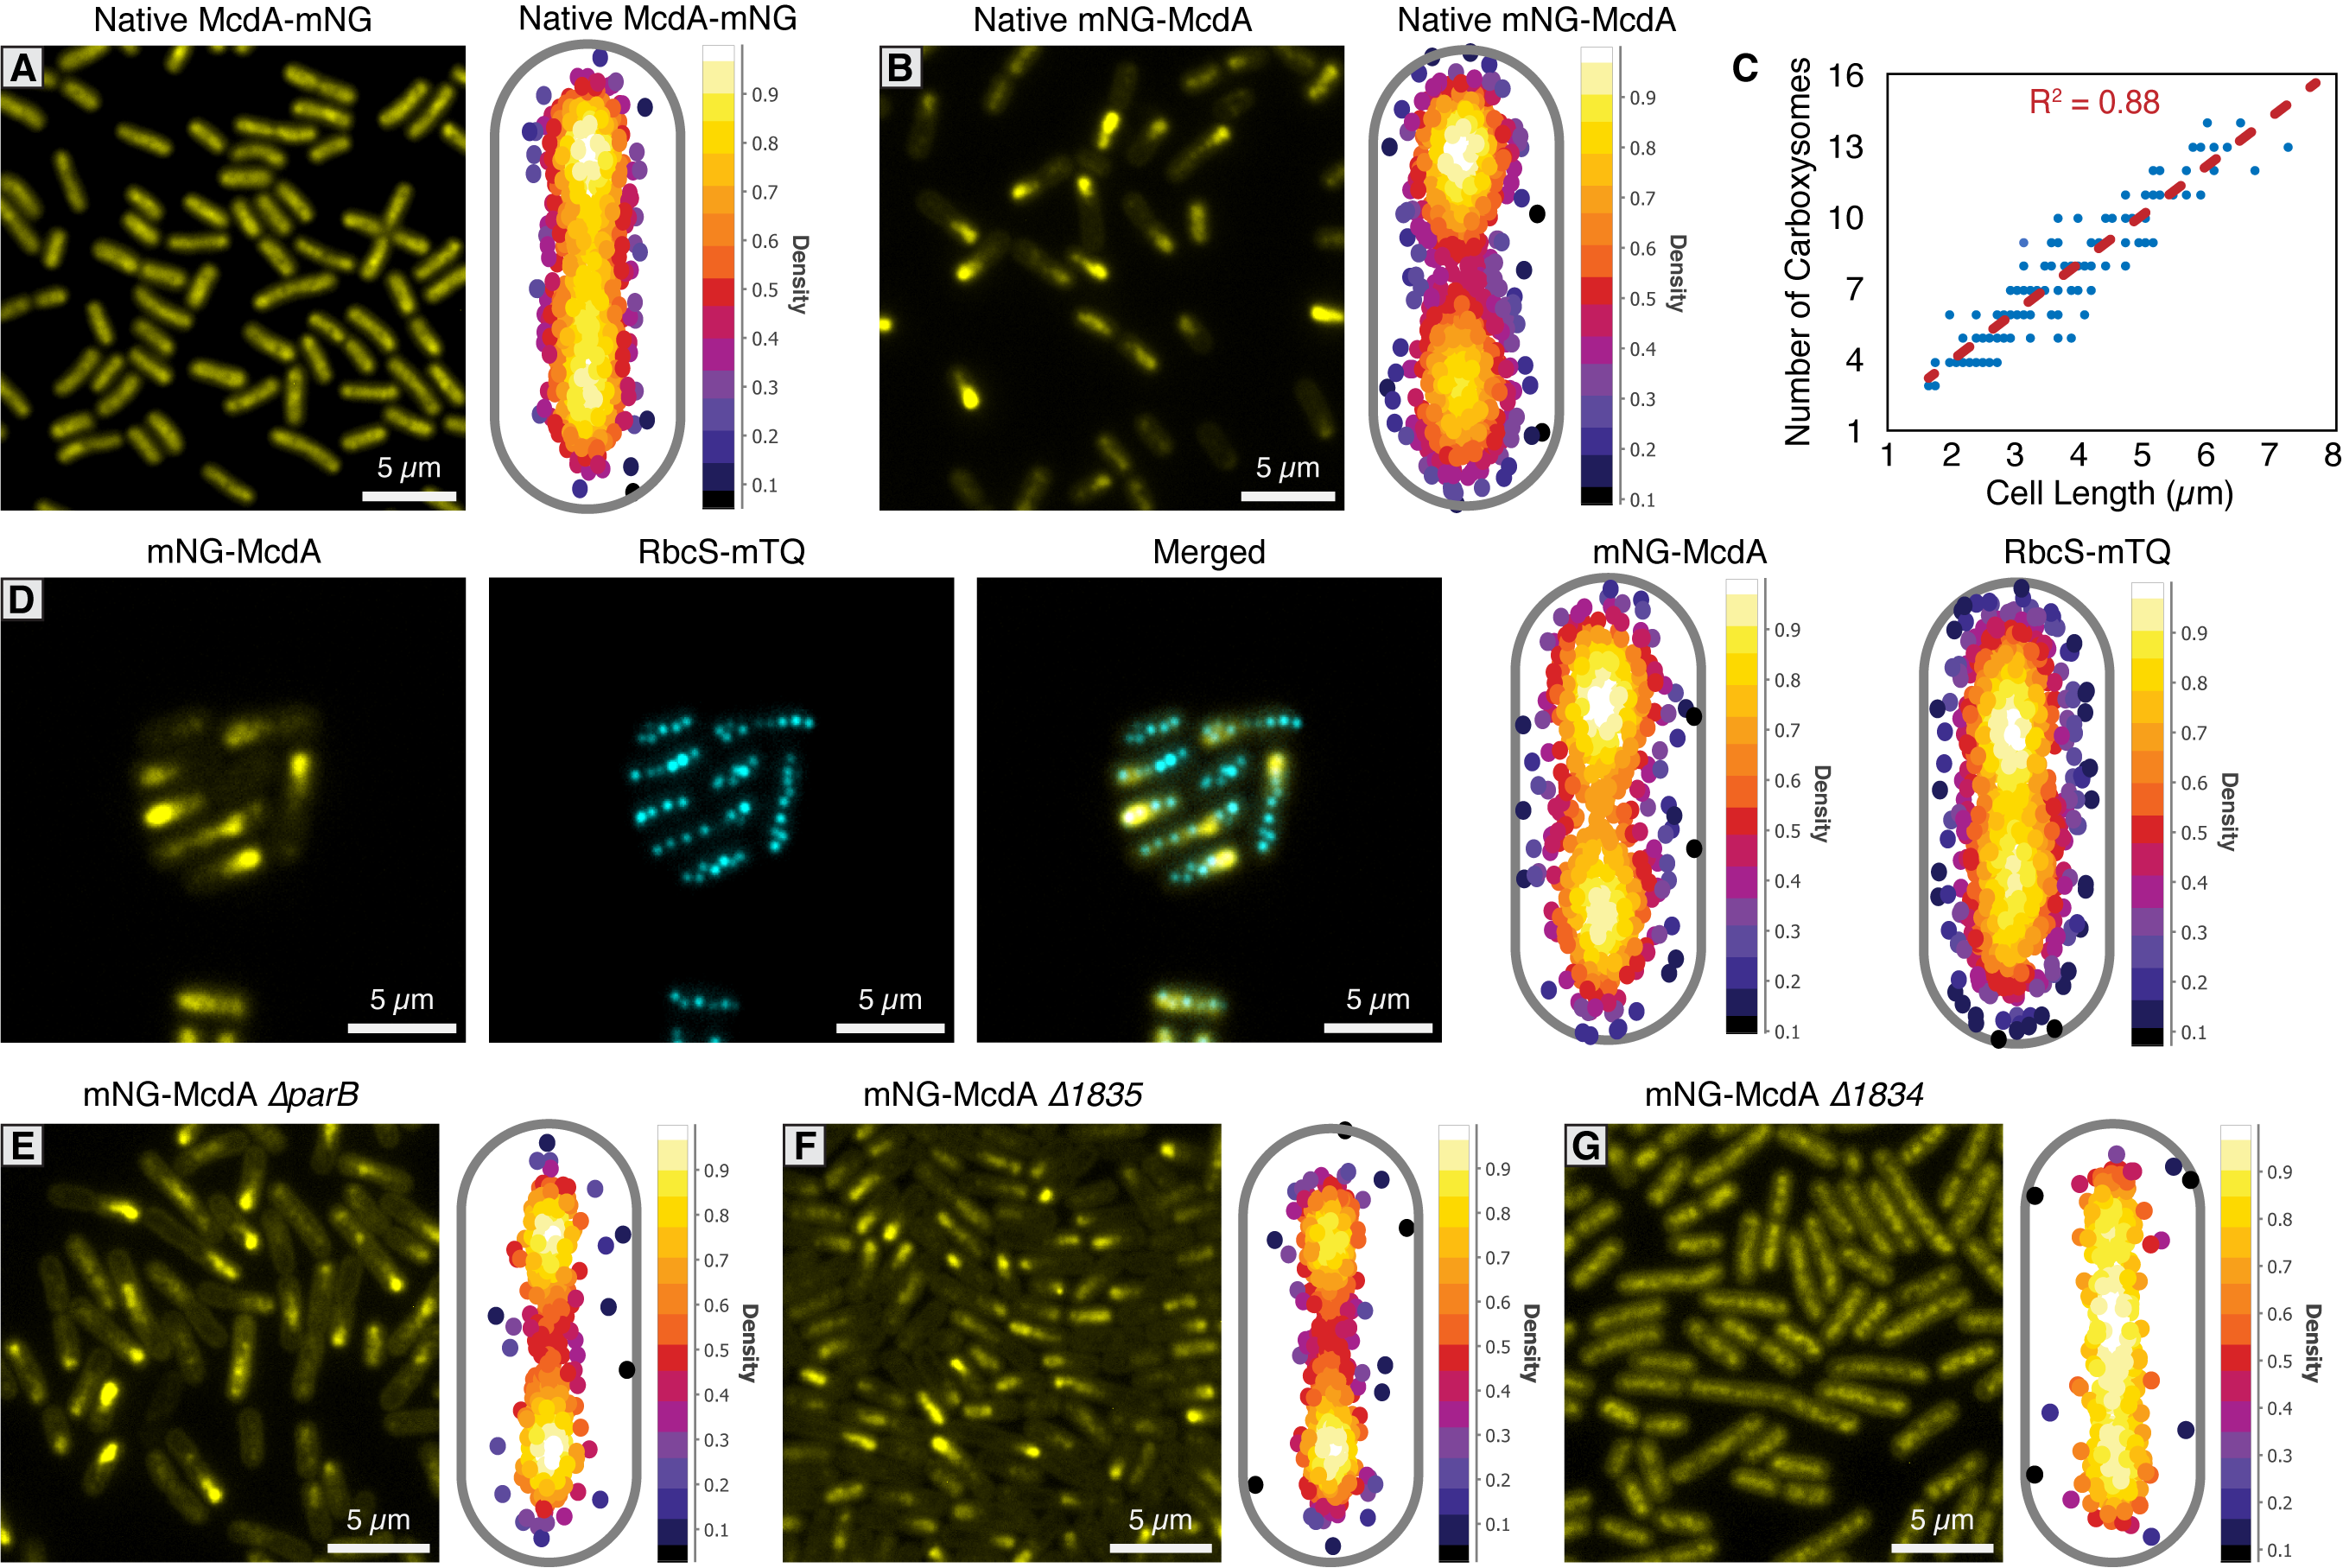

Supplement: supp [file elife-39723-supp-v1.zip › elife_poa_e39723_Figure_1_figure_supplement_1.tif]

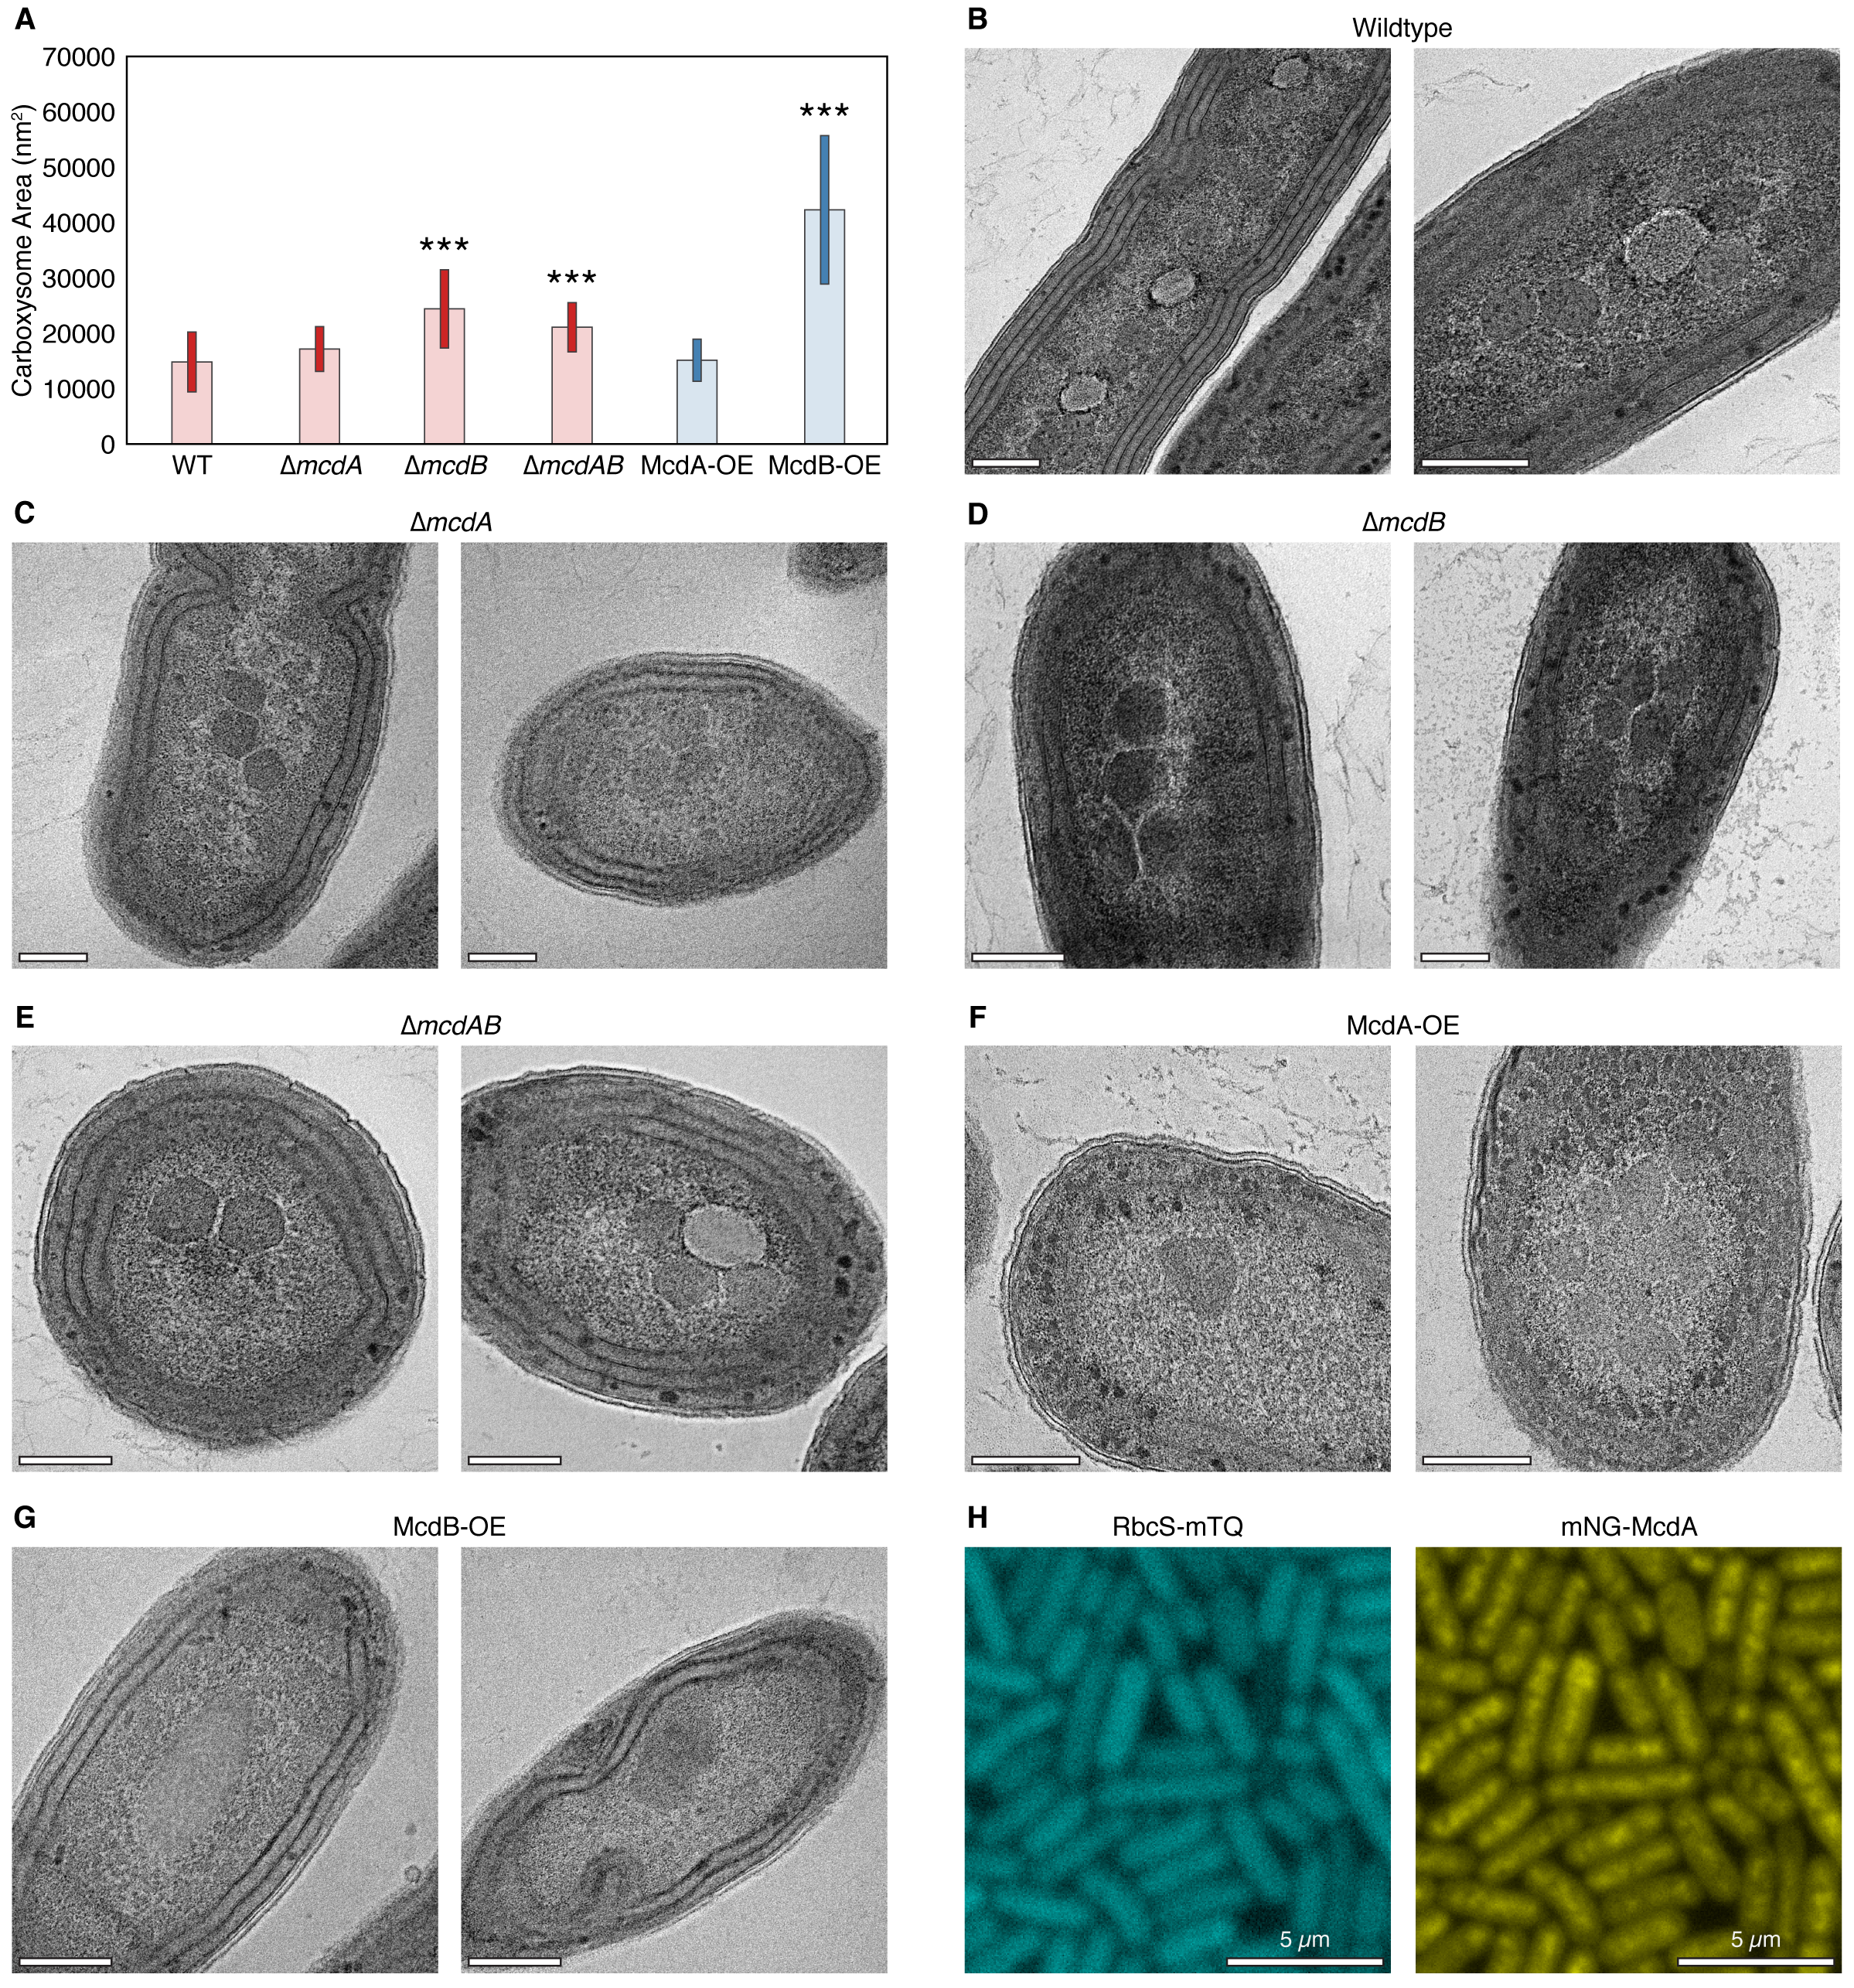

Supplement: supp [file elife-39723-supp-v1.zip › elife_poa_e39723_Figure_5_figure_supplement_1.tif]
